# Supplementary material
Source: PubMed Central journal article supplement (PMC2575161)
Supplement: E07-05-0442_1.pdf [file E07-05-0442_1.pdf]

## E07-05-0442 Fuller

**Figure S1. Pep12p and Gga but not AP-1 are required for cell-free transport with donor MSS from *gga1Δ gga2Δ* strain expressing K-V and acceptor MSS from *GGAI GGA2* strain expressing PSHA.** (A) Donor MSS from strain MAY4 (*gga1Δ gga2Δ*) expressing K-V and acceptor MSS from strain JBY209 (*GGAI GGA2*) expressing PSHA were combined and preincubated with 12 μg of purified Gga2p VHS-GAT, with 3.5 μg of anti Pep12p F(ab), with a mock-purified sample (equivalent volume) or with no addition (control), for 1 h on ice. Extent of transport observed for the control was 7.0%, adjusted to 100% in the figure. Experimental values (*Mock*, anti Pep12p F(ab), and Gga2p VHS-GAT) are shown as percent of the control values. This result indicates that the residual reaction seen with K-V MSS from the *gga1Δ gga2Δ* strain and PSHA MSS from the *GGAI GGA2* strain involves transport to the PVC and relies on Gga proteins from the acceptor membranes. (B) Donor MSS from strain MAY4 (*gga1Δ gga2Δ*) expressing K-V and acceptor MSS from strain JBY209 (*GGAI GGA2*) expressing PSHA were combined and preincubated with 14 μg of anti Apl2p antibody or no antibody (control) for 1 h on ice. Cell-free transport reactions were then carried out (20 min, 30°C). Extent of transport observed for controls (no anti Apl2p) was 8.4%, adjusted to 100% in the figure. Experimental values (+ anti Apl2p) are shown as percent of the control values.

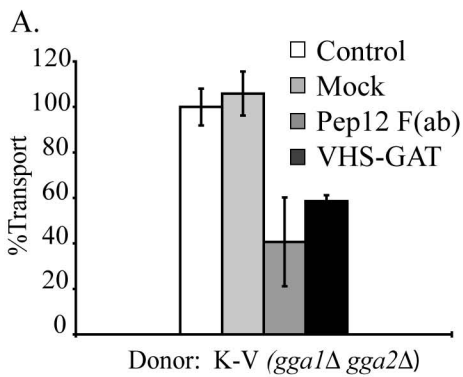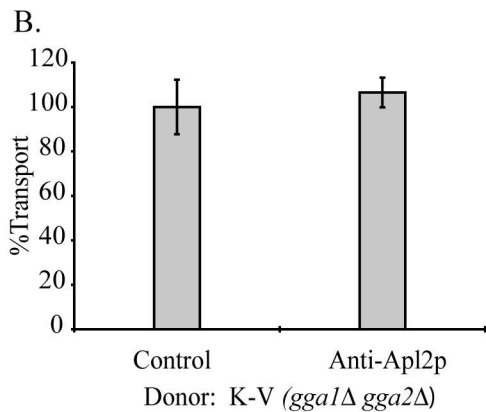

Figure S1.
